# Supplementary material for: Advancing Trauma-Informed Mental Health Counseling: A Global and Multidimensional Perspective on Adverse Childhood Experiences
Source: Research Square preprint supplement (doi:10.21203/rs.3.rs-7744866/v1), 2025-12-16
Supplement: Supplementary file 1 [file 3abf87ee21c397a7ad47cbc9.docx]

***Table 1***

*Summary of Psychometric Findings on ACE Instruments and Their Implications for Mental Health Counseling Practice*

| **Author(s)** | **Population / Sample Characteristics** | **Items & Instrument** | **Methodology** | **Best-Fitting Model / Key Findings** | **Reliability (α or ω)** | **RMSEA (90% CI)** | **CFI** |
| --- | --- | --- | --- | --- | --- | --- | --- |
| Afifi et al. (2017) | Original ACE Study sample | 11 ACE items | CFA + Logistic Regression | 3-factor model; spanking included as abuse improved fit (λ = .57). Both spanking and abuse predicted adult mental health outcomes. | NR | 0.052 (.044–.060) | 0.996 |
| Afifi et al. (2020) | Canadian parents (~45 yrs, 87% female) & adolescents (~15 yrs) | 15 expanded ACE-Q items | Multi-group CFA | 2-factor model: (1) child maltreatment/peer victimization, (2) household challenges; high factor correlations. | NR | Parents: .051 (.045–.057); Adolescents: .035 (.028–.043) | Parents: .952; Adolescents: .962 |
| Afifi et al. (2023) | Canadian adolescents (n ≈ 15 yrs; 51.7% girls) | 15+ expanded ACE-Q | CFA + Logistic Regression | Confirmed 2-factor structure; all ACEs (except spanking) linked to higher substance use risk. | NR | NR | NR |
| Almuneef et al. (2014) | Adults in Saudi Arabia (n=931; 57% female; mean age 31) | 43 WHO ACE-IQ items | Descriptive epidemiology | High ACE prevalence; 4+ ACEs linked to chronic disease and risky behaviors; no factor analysis. | NR | NR | NR |
| Brown et al. (2015) | US adults, NESARC (n=25,654) | 10 ACE items (CTQ adapted) | CFA + SEM | Strong sex invariance; sexual abuse and parental violence predicted intimate partner aggression; substance abuse mediated effects. | NR | 0.027 (CFA); 0.016 (SEM) | 0.991 / 0.991 (CFA); 0.990 / 0.989 (SEM) |
| Dube et al. (2004) | Original ACE data, test–retest over 2 years | --- | Test–retest reliability | Kappa = .46–.86 | NR | NR | NR |
| Ford et al. (2014) | US adults, BRFSS 2009/2010 (N=85,248) | 11 ACE items | EFA, CFA, Multi-group CFA | 3-factor model: Household Dysfunction, Physical/Emotional Abuse, Sexual Abuse; stable across gender/age. | 0.61–0.80 subscales | 0.02 | 0.99 |
| Mei et al. (2022) | 97,314 US adults (2019 BRFSS) | 11 ACE items | EFA, Multi-group CFA, Higher-order modeling | 3-factor model with second-order ACE factor; configural, metric, scalar invariance across demographics. | Ω = .906 overall; subscales > .80 | 0.015–0.027 | 0.986–0.997 |
| Mersky et al. (2017) | Low-income women, Wisconsin (N=1,241) | 17 items (10 + 7 expanded) | EFA + Test–retest | 10-item: 2-factor; 17-item: 4-factor (maltreatment, neglect, family loss, poverty); peer victimization linked to stress. | Α = .77–.81; ICCs 0.67–0.91 | NR | NR |
| Michael et al. (2025) | 357 southeastern US college students (18–22 yrs) | 10 ACE-Q items | CFA (AMOS) | 3-factor model best fit; neglect subscale low reliability; 1-factor total score also adequate. | Abuse: .59; Neglect: .35; Household Dysfunction: .73 | < .007 | > .91 |
| Murphy et al. (2014) | 75 mothers (clinical/community) | 10-item adapted ACE questionnaire | Internal consistency, correlation with Adult Attachment | α = .88 | NR | NR | NR |
| Olofson (2018) | Young adults, PSID Child Development Supplement | 13 ACE items | CFA (WLSMV) | Two-factor model: maltreatment and dysfunction; moderate factor correlation; gender invariance supported. | NR | 0.021 (.015–.026) | 0.993 (CFI), 0.989 (TLI) |
| Van der Feltz-Cornelis & de Beurs (2023) | Netherlands clinical samples (ANXDEP & SSRD) | 10 ACE items | CFA, criterion validity | Two-factor model (abuse vs. dysfunction) superior; strong concurrent validity with anxiety/depression measures. | Total α = .89; subscales .55–.76 | 0.01–0.04 | 0.99–1.00 |
