# Supplementary material for: Advancing Trauma-Informed Mental Health Counseling: A Global and Multidimensional Perspective on Adverse Childhood Experiences
Source: Research Square preprint supplement (doi:10.21203/rs.3.rs-7744866/v1), 2025-12-16
Supplement: Supplementary file 2 [file 8dda74c0caa1c4ecc7730cd6.docx]

**Table 2**

| **Author(s)** | **Mental Health Counseling Implications** |
| --- | --- |
| Afifi et al. (2017) | Highlights importance of including spanking in assessments; distinct abuse types predict mental health risks, guiding targeted trauma interventions. |
| Afifi et al. (2020) | Supports inclusion of peer victimization and household challenges; informs age-appropriate, family-inclusive mental health strategies. |
| Afifi et al. (2023) | Emphasizes assessing substance use risk, especially in females; supports resilience-focused, gender-sensitive counseling approaches. |
| Almuneef et al. (2014) | Demonstrates ACE-IQ feasibility internationally; encourages culturally sensitive ACE screening and health risk prevention. |
| Brown et al. (2015) | Validates detailed ACE assessment; informs gender-sensitive interventions for trauma and intimate partner violence prevention. |
| Dube et al. (2004) | Highlights moderate stability of ACE reporting; underscores need for repeated assessment in clinical monitoring. |
| Ford et al. (2014) | Supports reliable, multidimensional screening; guides trauma-informed counseling across diverse adult populations. |
| Mei et al. (2022) | Confirms robust, generalizable ACE measurement; supports culturally competent, population-level mental health assessments. |
| Mersky et al. (2017) | Illustrates need to assess broader adversity domains; informs trauma and socioeconomic stress interventions in vulnerable populations. |
| Michael et al. (2025) | Supports multidimensional assessment in emerging adults; cautions on neglect subscale; emphasizes tailored trauma-informed college counseling. |
| Murphy et al. (2014) | Validates ACE use in clinical samples; links ACEs with adult attachment patterns; informs trauma-focused maternal mental health care. |
| Olofson (2018) | Confirms multidimensional ACE structure in young adults; supports gender-sensitive trauma assessment and intervention. |
| Van der Feltz-Cornelis & de Beurs (2023) | Reinforces multidimensional ACE screening utility in clinical mental health settings; supports integrated trauma and mood disorder interventions. |

*Mental Health Counseling Implications based on ACEs Psychometric Studies*
